# Supplementary material for: Quantum-classical hybrid computation of electron transfer in a cryptochrome protein via VQE-PDFT and multiscale modeling
Source: Royal Society of Chemistry journal article supplement (doi:10.1039/d5sc07528a), 2026-01-01
Supplement: d5sc07528a1.pdf [file d5sc07528a1.pdf]

# Supplementary Information for: Quantum-Classical Hybrid Computation of Electron Transfer in a Cryptochrome Protein via VQE-PDFT and Multiscale Modeling

December 28, 2025

## 1 Supplementary Figures

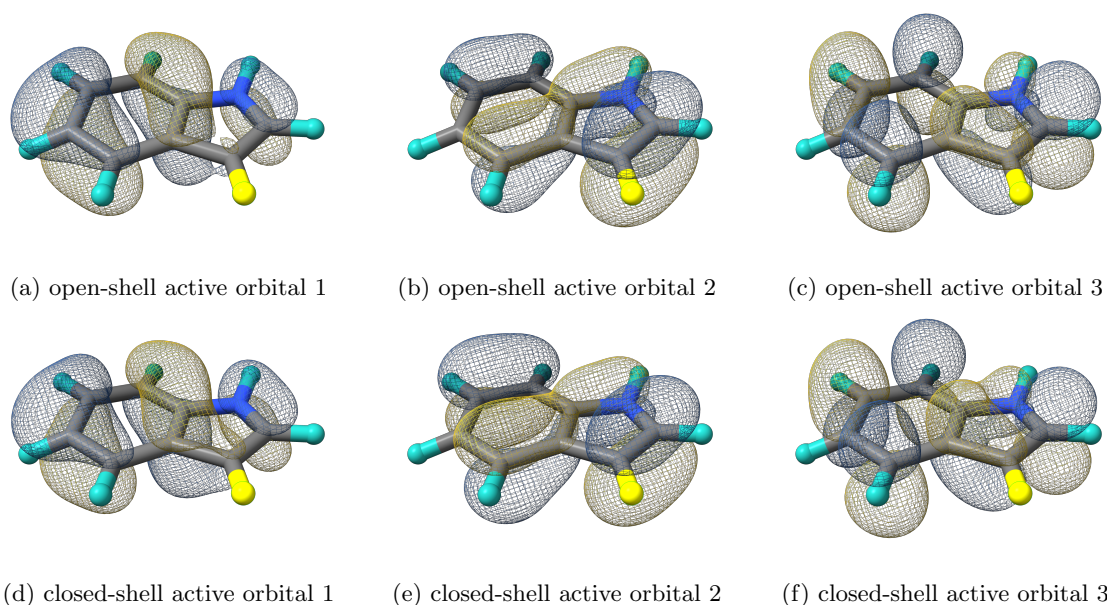

Figure S1: **Active space orbitals visualization of indole rings.** Top row: (3e,3o) open shell active space orbitals; Bottom row: (4e,3o) closed shell active space orbitals. These orbitals are Hartree-Fock canonical orbitals obtained by PySCF's CASCI module [1]. The yellow marked atoms are the hydrogen link-atoms. The Isosurfaces are rendered at value 0.03 a.u. using ChimeraX [2].

## 2 Supplementary Tables

| system              | ansatz | active space | qubits | logical circuit |             |               |               | Pauli words<br>(truncated) |
|---------------------|--------|--------------|--------|-----------------|-------------|---------------|---------------|----------------------------|
|                     |        |              |        | circuit depth   | total gates | 1-qubit gates | 2-qubit gates |                            |
| $NH_3 \cdots FCl$   | UCCSD  | (10e,10o)    | 20     | 9164            | 14079       | 671           | 13408         | 6389                       |
| $NH_3 \cdots Cl_2$  |        | (10e,10o)    | 20     | 9354            | 14425       | 677           | 13748         | 6107                       |
| $NH_3 \cdots F_2$   |        | (10e,10o)    | 20     | 7220            | 11251       | 539           | 10712         | 6157                       |
| $HCN \cdots FCl$    |        | (8e,8o)      | 16     | 1592            | 2628        | 140           | 2488          | 2817                       |
| $H_2O \cdots FCl$   |        | (10e,10o)    | 20     | 10987           | 17135       | 835           | 16300         | 12647                      |
| $C_2H_2 \cdots FCl$ |        | (10e,10o)    | 20     | 3014            | 4825        | 217           | 4608          | 3727                       |
| $C_2H_4 \cdots F_2$ |        | (10e,10o)    | 20     | 10949           | 17085       | 833           | 16252         | 4645                       |
| $NH_3$              |        | (8e,8o)      | 16     | 2711            | 4436        | 252           | 4184          | 2461                       |
| $HCN$               |        | (6e,6o)      | 12     | 388             | 689         | 45            | 644           | 551                        |
| $H_2O$              |        | (8e,8o)      | 16     | 1984            | 3260        | 180           | 3080          | 2305                       |
| $C_2H_2$            |        | (10e,10o)    | 20     | 3255            | 5229        | 241           | 4988          | 4007                       |
| $C_2H_4$            |        | (10e,10o)    | 20     | 9344            | 14633       | 709           | 13924         | 4159                       |
| $FCl$               |        | (2e,2o)      | 4      | 9               | 15          | 3             | 12            | 15                         |
| $Cl_2$              |        | (2e,2o)      | 4      | 9               | 15          | 3             | 12            | 15                         |
| $F_2$               |        | (2e,2o)      | 4      | 9               | 15          | 3             | 12            | 15                         |

Table S1: **Quantum resource summary for calculating dissociation energies of Charge-Transfer dataset.** The first 7 rows are dimers in CT7/04 dataset, while the other rows are monomers of the above dimers. For the largest CT dimer,  $C_2H_4 \cdots F_2$ , we employed an active space of (10e,10o), which is slightly smaller than the (14e,14o) space used in the original MC-PDFT study, in order to satisfy the limited simulated qubit count within 20 qubits for this proof-of-concept VQE-PDFT demonstration. The reported ‘Pauli words’ counts correspond to the Pauli decomposition of the CASCI active-space Hamiltonian after applying the default TenCirChem [3] coefficient cutoff (discarding terms with  $|c| < 10^{-12}$ ) prior to fermion-to-qubit mapping (Jordan-Wigner transformation here). Note that all calculations were conducted by noiseless simulation rather than any actual quantum hardware.

(a) ROUCCSD and HEA resource summary

| system<br>ErCRY4 | ansatz  | active<br>space | qubits | logical circuit  |                |                  |                  | Pauli words |       |
|------------------|---------|-----------------|--------|------------------|----------------|------------------|------------------|-------------|-------|
|                  |         |                 |        | circuit<br>depth | total<br>gates | 1-qubit<br>gates | 2-qubit<br>gates | truncated   | total |
| open shell       | ROUCCSD | (3e,3o)         | 4      | 35               | 55             | 7                | 48               | 118         | 262   |
|                  | OHEA    | (3e,3o)         | 4      | 6                | 7              | 2                | 5                | 100         | 219   |
| closed shell     | ROUCCSD | (4e,3o)         | 4      | 35               | 56             | 8                | 48               | 118         | 262   |
|                  | CHEA    | (4e,3o)         | 4      | 4                | 5              | 2                | 3                | 100         | 219   |

(b) HEA resource summary after compiling to a 13-qubit chip

| system<br>ErCRY4 | ansatz | active<br>space | qubits | transpiled circuit |                |                  |                  | Commuting groups        |                 |
|------------------|--------|-----------------|--------|--------------------|----------------|------------------|------------------|-------------------------|-----------------|
|                  |        |                 |        | circuit<br>depth   | total<br>gates | 1-qubit<br>gates | 2-qubit<br>gates | global<br>(Hamiltonian) | local<br>(RDMs) |
| open shell       | OHEA   | (3e,3o)         | 4      | 46                 | 61             | 46               | 15               | 26                      | 110             |
| closed shell     | CHEA   | (4e,3o)         | 4      | 18                 | 23             | 16               | 7                |                         |                 |

Table S2: **Quantum resource summary for the active space of QM region in ErCRY4 protein.** (a) In computation with ROUCCSD, the Pauli words were generated by Jordan-Wigner transformation, while the HEA circuits employed parity transformation with symmetry tapering (two qubits) in the fixed ( $N_\alpha, N_\beta$ ) sector, thereby reducing the number of distinct Pauli terms to be measured. The “truncated” denotes Pauli words after the default TenCirChem coefficient cutoff ( $|c| < 10^{-12}$ ), whereas “total” reports the corresponding untruncated term counts. (b) After compilation process, the circuit depth of HEAs increased compared to the logical circuit since the logical gates were decomposed by native gate set. Pauli terms were partitioned into qubit-wise commuting (QWC) groups using the built-in TensorCircuit routine [4], such that any two operators in the same group never act with different non-identity Pauli operators on the same qubit, therefore may be measured simultaneously (100  $\rightarrow$  26 global grouping for the truncated Hamiltonian evaluation at each step of VQE). On the other hand, the RDM measurements were performed matrix-element-wise (‘total’) and thus employ only element-wise QWC grouping (219  $\rightarrow$  110 local groups for the full RDM operator set).

| Dimer               | Methods  | E Dimer<br>(Hartree) | E m-1<br>(Hartree) | E m-2<br>(Hartree) |
|---------------------|----------|----------------------|--------------------|--------------------|
| $NH_3 \cdots FCl$   | VQE      | -615.128804          | -56.221505         | -558.898720        |
|                     | VQE-PDFT | -616.242235          | -56.503348         | -559.720469        |
|                     | MC-PDFT  | -616.223810          | -56.490022         | -559.714003        |
| $NH_3 \cdots Cl_2$  | VQE      | -975.223380          | -56.221467         | -918.999406        |
|                     | VQE-PDFT | -976.527014          | -56.503455         | -920.015446        |
|                     | MC-PDFT  | -976.507738          | -56.490022         | -920.010464        |
| $NH_3 \cdots F_2$   | VQE      | -254.974775          | -56.221427         | -198.753481        |
|                     | VQE-PDFT | -255.898334          | -56.503449         | -199.391897        |
|                     | MC-PDFT  | -255.867282          | -56.490022         | -199.375496        |
| $HCN \cdots FCl$    | VQE      | -651.815085          | -92.908656         | -558.902946        |
|                     | VQE-PDFT | -653.055775          | -93.329282         | -559.721513        |
|                     | MC-PDFT  | -653.034226          | -93.314369         | -559.714003        |
| $H_2O \cdots FCl$   | VQE      | -634.982061          | -76.063217         | -558.902897        |
|                     | VQE-PDFT | -636.098589          | -76.371825         | -559.721511        |
|                     | MC-PDFT  | -636.070153          | -76.349168         | -559.714003        |
| $C_2H_2 \cdots FCl$ | VQE      | -635.759503          | -76.850009         | -558.902915        |
|                     | VQE-PDFT | -636.962657          | -77.236253         | -559.721512        |
|                     | MC-PDFT  | -636.948390          | -77.227991         | -559.714003        |
| $C_2H_4 \cdots F_2$ | VQE      | -276.817798          | -78.065357         | -198.754252        |
|                     | VQE-PDFT | -277.876723          | -78.483346         | -199.392029        |
|                     | MC-PDFT  | -277.852830          | -78.476804         | -199.375496        |

Table S3: **The absolute energies of dimers and monomers in the Charge-Transfer dataset.** The results were obtained via VQE in CASCI level, VQE-PDFT, and the MC-PDFT method, while the MC-PDFT's results were directly fetched from the Supplementary Material of Ref. [5]. Note that the VQE-PDFT energies are based on CASCI framework, whereas the literature MC-PDFT values rely on CASSCF framework. Because MC-PDFT is not variational with respect to the choice of multiconfigurational reference, these absolute energies are provided for general reference rather than for ranking the methods. For assessing accuracy in dissociation energies, the MUE values reported in Table 1 are more informative. Here, all calculations were performed in the jul-cc-pVTZ basis [6]. The tPBE functional was adopted in both VQE-PDFT and MC-PDFT calculations. The m1 and m2 refer to the two monomers in the m1-m2 dimer, respectively.

| frame | $\Delta G^o$ | $\lambda$   |
|-------|--------------|-------------|
| 157   | 0.099934408  | 0.549241928 |
| 264   | 0.043676293  | 0.347217505 |
| 461   | 0.040885297  | 0.220829577 |
| 631   | 0.163803428  | 0.517004701 |
| 682   | 0.038024409  | 0.495626829 |
| 706   | 0.071676358  | 0.307290925 |
| 777   | 0.037682775  | 0.547830361 |
| 1077  | 0.033809862  | 0.53029316  |
| 1107  | 0.167015044  | 0.532070337 |
| 1237  | 0.084752646  | 0.131341481 |
| 1243  | 0.023647298  | 0.623133927 |
| 1311  | 0.025645922  | 0.415820148 |
| 1368  | 0.05873396   | 0.774978721 |
| 1502  | 0.151100112  | 0.464021283 |
| 1603  | 0.113313698  | 0.217739833 |
| 1626  | 0.000816062  | 0.288449438 |
| 1627  | 0.021599893  | 0.345962916 |
| 1965  | 0.115245417  | 0.488976157 |
| 2071  | 0.13571487   | 0.340026962 |
| 2180  | 0.020222078  | 0.57379004  |

Table S4:  $\Delta G^o$  and  $\lambda$  calculations by empirical HEA on noiseless simulators. The 20 protein conformations were randomly sampled from the MD simulation of GS ErCRY4 protein in reference [7]. The frame numbers indicate locations of conformations during the entire simulation process. All results are given in eV.

| <b>frame</b> | $H_{DA}$     | $ H_{DA} ^2$ |
|--------------|--------------|--------------|
| 157          | -9.44011E-04 | 8.91158E-07  |
| 264          | 1.50656E-02  | 2.26972E-04  |
| 461          | -3.43295E-02 | 1.17851E-03  |
| 631          | -2.49168E-04 | 6.20846E-08  |
| 682          | -2.21206E-03 | 4.89319E-06  |
| 706          | -1.65424E-04 | 2.73650E-08  |
| 777          | -4.04790E-04 | 1.63855E-07  |
| 1077         | 1.48556E-02  | 2.20688E-04  |
| 1107         | -3.80092E-04 | 1.44470E-07  |
| 1237         | 1.37738E-03  | 1.89717E-06  |
| 1243         | 1.67444E-03  | 2.80376E-06  |
| 1311         | 5.25197E-03  | 2.75831E-05  |
| 1368         | -1.37476E-03 | 1.88996E-06  |
| 1502         | -1.84872E-02 | 3.41775E-04  |
| 1603         | 3.46027E-03  | 1.19735E-05  |
| 1626         | 2.59327E-03  | 6.72507E-06  |
| 1627         | 3.57321E-03  | 1.27678E-05  |
| 1965         | -1.51863E-02 | 2.30625E-04  |
| 2071         | -2.02746E-03 | 4.11059E-06  |
| 2180         | 3.41750E-03  | 1.16793E-05  |

Table S5: **Electronic coupling calculations.** The 6-31G(d) basis set and the CAM-B3LYP functional were used in all calculations. The 20 conformations were randomly sampled from the MD simulation of GS ErCRY4 protein in reference [7]. The frame numbers indicate locations of conformations during the entire simulation process. All results are given in eV.

| frame | $\Delta G^o$ | $\lambda$   |
|-------|--------------|-------------|
| 157   | 0.075376004  | 0.533793409 |
| 264   | 0.066947358  | 0.550103409 |
| 461   | 0.022934202  | 0.529776474 |
| 631   | 0.098816411  | 0.654202407 |
| 682   | 0.102475986  | 0.552455689 |
| 706   | 0.109047811  | 0.593777179 |
| 777   | 0.091658923  | 0.600336874 |
| 1077  | 0.081086545  | 0.581411027 |
| 1107  | 0.082290769  | 0.627811309 |
| 1237  | 0.039260208  | 0.569951056 |
| 1243  | 0.110907047  | 0.655571383 |
| 1311  | 0.004307911  | 0.521179077 |
| 1368  | 0.035574098  | 0.544496837 |
| 1502  | 0.131879075  | 0.603524833 |
| 1603  | 0.003378448  | 0.516846946 |
| 1626  | 0.068215042  | 0.512984809 |
| 1627  | 0.036969471  | 0.529376022 |
| 1965  | 0.123957956  | 0.655946507 |
| 2071  | 0.043474286  | 0.524336485 |
| 2180  | 0.049975887  | 0.543812624 |

Table S6:  $\Delta G^o$  and  $\lambda$  calculations by ROUCCSD on noiseless simulators. The 20 protein conformations were randomly sampled from the MD simulation of GS ErCRY4 protein in reference [7]. The frame numbers indicate locations of conformations during the entire simulation process. All results are given in eV.

| index                      | system                    | shell type   | Empirical HEA<br>noiseless | ROUCCSD    |
|----------------------------|---------------------------|--------------|----------------------------|------------|
| 1                          | point-a TrpB <sup>+</sup> | open-shell   | -362.99415                 | -362.99942 |
| 2                          | point-a TrpC <sup>0</sup> | closed-shell | -363.26459                 | -363.26554 |
| 3                          | point-b TrpB <sup>0</sup> | closed-shell | -363.26777                 | -363.26682 |
| 4                          | point-b TrpC <sup>+</sup> | open-shell   | -362.98880                 | -362.98758 |
| 5                          | point-c TrpB <sup>0</sup> | closed-shell | -363.26994                 | -363.26920 |
| 6                          | point-c TrpC <sup>+</sup> | open-shell   | -362.99378                 | -362.99736 |
| 7                          | point-d TrpB <sup>+</sup> | open-shell   | -362.99775                 | -362.99268 |
| 8                          | point-d TrpC <sup>0</sup> | closed-shell | -363.26632                 | -363.26518 |
| $\lambda$ (eV)             |                           |              | 0.34003                    | 0.52434    |
| $\Delta G^o$ (eV)          |                           |              | 0.13571                    | 0.04347    |
| $k_{ET}$ ( $10^8 s^{-1}$ ) |                           |              | 1.89064                    | 2.48679    |

Table S7: **Single-point energies, Marcus parameters, and the transfer rate of the random conformation.** The conformation was randomly selected as the 2071 frame from the 20 conformations above and calculated within the QM/MM framework. The calculations were conducted by ROUCCSD and empirical HEA on noiseless simulator. The single-point energies are given in Hartree. The 6-31G basis set and the tPBE functional were used in all calculations.

## References

- [1] Sun Q, Zhang X, Banerjee S, Bao P, Barbry M, Blunt NS, et al. Recent Developments in the PySCF Program Package. *The Journal of Chemical Physics*. 2020;153(2):024109.
- [2] Meng EC, Goddard TD, Pettersen EF, Couch GS, Pearson ZJ, Morris JH, et al. ChimeraX. *Protein Science*. 2023;32(11):e4792.
- [3] Li W, Allcock J, Cheng L, Zhang SX, Chen YQ, Mailoa JP, et al. TenCirChem: An Efficient Quantum Computational Chemistry Package for the NISQ Era. *Journal of Chemical Theory and Computation*. 2023;19(13):3966-81.
- [4] Zhang SX, Allcock J, Wan ZQ, Liu S, Sun J, Yu H, et al. TensorCircuit: A Quantum Software Framework for the NISQ Era. *Quantum*. 2023;7:912.
- [5] Ghosh S, Sonnenberger AL, Hoyer CE, Truhlar DG, Gagliardi L. Multiconfiguration Pair-Density Functional Theory Outperforms Kohn–Sham Density Functional Theory and Multireference Perturbation Theory for Ground-State and Excited-State Charge Transfer. *Journal of Chemical Theory and Computation*. 2015;11(8):3643-9.
- [6] Papajak E, Zheng J, Xu X, Leverentz HR, Truhlar DG. Perspectives on Basis Sets Beautiful: Seasonal Plantings of Diffuse Basis Functions. *Journal of Chemical Theory and Computation*. 2011;7(10):3027-34.
- [7] Xu J, Jarocha LE, Zollitsch T, Konowalczyk M, Henbest KB, Richert S, et al. Magnetic Sensitivity of Cryptochrome 4 from a Migratory Songbird. *Nature*. 2021;594(7864):535-40.
